# Supplementary material for: Constructing a brand-new advanced oxidation process system composed of MgO2 nanoparticles and MgNCN/MgO nanocomposites for organic pollutant degradation
Source: Royal Society of Chemistry journal article supplement (doi:10.1039/d1en00751c), 2021-11-30
Supplement: d1en00751c1.pdf [file d1en00751c1.pdf]

## Supporting Information

### **Constructing a brand-new advanced oxidation process system comprised of MgO<sub>2</sub> nanoparticles and MgNCN/MgO nanocomposites for organic pollutant degradation**

Ningning Dong <sup>a</sup>, Doudou Wu <sup>a</sup>, Lifa Ge <sup>a</sup>, Wei Wang <sup>a, \*</sup>, Fatang Tan <sup>a</sup>, Xinyun Wang <sup>a</sup>,  
Xueliang Qiao <sup>a</sup> and Po Keung Wong <sup>b</sup>

*<sup>a</sup> State Key Laboratory of Materials Processing and Die & Mould Technology, School of  
Materials Science and Engineering, Huazhong University of Science and Technology, Wuhan  
430074, Hubei, China*

*<sup>b</sup> School of Life Sciences, The Chinese University of Hong Kong, Shatin, NT, Hong Kong SAR,  
China*

\* Corresponding author:

Wei Wang, Tel/fax: +86-27-87541540, E-mail: weiwang@hust.edu.cn

## Preparation of individual MgNCN and MgO

MgNCN nanoparticles were prepared by calcining the mixture of thiourea and  $(\text{MgCO}_3)_4\cdot\text{Mg}(\text{OH})_2\cdot 5\text{H}_2\text{O}$ . Typically, 1.00 g of thiourea and 0.33 g of  $(\text{MgCO}_3)_4\cdot\text{Mg}(\text{OH})_2\cdot 5\text{H}_2\text{O}$  were mixed evenly in a agate mortar and the homogeneous mixture was transferred into a crucible. Subsequently, the crucible was covered with a lid and aluminum foil, and then heated from room temperature to 550 °C with a heating rate of 10 °C/min and kept at 550 °C for another 2 h in a muffle furnace. Finally, pure-phased MgNCN was obtained after cooling to room temperature. MgO was prepared by calcining  $(\text{MgCO}_3)_4\cdot\text{Mg}(\text{OH})_2\cdot 5\text{H}_2\text{O}$  alone followed the same procedure.

## Degradation kinetics

The pseudo-first order (Eq. 1) and pseudo-second order (Eq. 2) models were used to study the kinetics of MB degradation in the  $\text{MgO}_2\text{-MgNCN/MgO}$  system under different conditions including the  $\text{MgO}_2$  dosage, MgNCN/MgO dosage, initial solution pH and degradation temperature.

$$\text{Pseudo-first order: } \ln \frac{C_t}{C_0} = -k_1 t \quad (1)$$

$$\text{Pseudo-second order: } \frac{1}{C_0} - \frac{1}{C_t} = k_2 t \quad (2)$$

Where  $k_1$  ( $\text{h}^{-1}$ ) and  $k_2$  ( $\text{L mg}^{-1} \text{h}^{-1}$ ) are reaction rate constants of the pseudo-first-order and pseudo-second-order models, respectively.  $C_0$  (mg/L) is the initial concentration of MB solution, while  $C_t$  (mg/L) is the concentration of MB at the certain time  $t$  (h).

### Slow-release test of MgO<sub>2</sub>

It was well known that MgO<sub>2</sub> could slowly react with H<sub>2</sub>O to release H<sub>2</sub>O<sub>2</sub> (Eq. 3). The slow-release ability of MgO<sub>2</sub> in aqueous solution was determined by the concentration of released H<sub>2</sub>O<sub>2</sub> in aqueous solution using a standard solution of potassium permanganate (KMnO<sub>4</sub>). Specifically, 60 mg of MgO<sub>2</sub> was added into 300 mL of water under continuous stirring. At given time intervals, 15 mL of suspension was taken out and immediately filtered to remove solid particles. The released H<sub>2</sub>O<sub>2</sub> concentration in the filtrate was quantitatively evaluated using the permanganate (0.4 mM) titration method (Eq. 4).

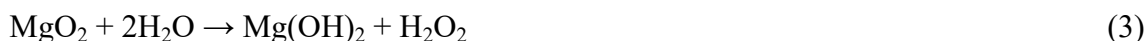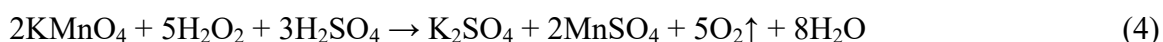

### Oxidant utilization efficiency

To evaluate the utilization efficiency of MgO<sub>2</sub>, 20 mg of MgO<sub>2</sub> nanoparticles and 10 mg of MgNCN/MgO nanocomposites were used to continuously degrade 10 mg/L MB until MB was no longer degraded. Then, the utilization efficiency of MgO<sub>2</sub> was obtained according to the reported method.<sup>1</sup> Similarly, the utilization efficiencies of common H<sub>2</sub>O<sub>2</sub> and CaO<sub>2</sub> (equimolar active oxygen to MgO<sub>2</sub>), activated by MgNCN/MgO (10 mg) and Fe<sup>2+</sup> (46 mg of FeSO<sub>4</sub>·7H<sub>2</sub>O), were estimated for comparisons. Considering the difference in oxidant purity, the utilization efficiencies of oxidants were calculated based on their active oxygen content.

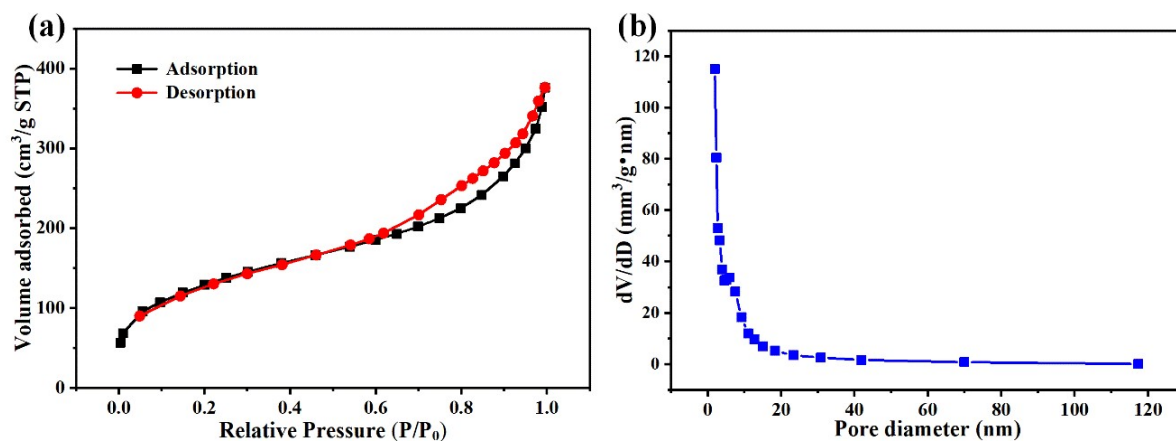

**Figure S1.** N<sub>2</sub> adsorption/desorption isotherms (a) and pore-size distribution (b) of MgO<sub>2</sub> nanoparticles.

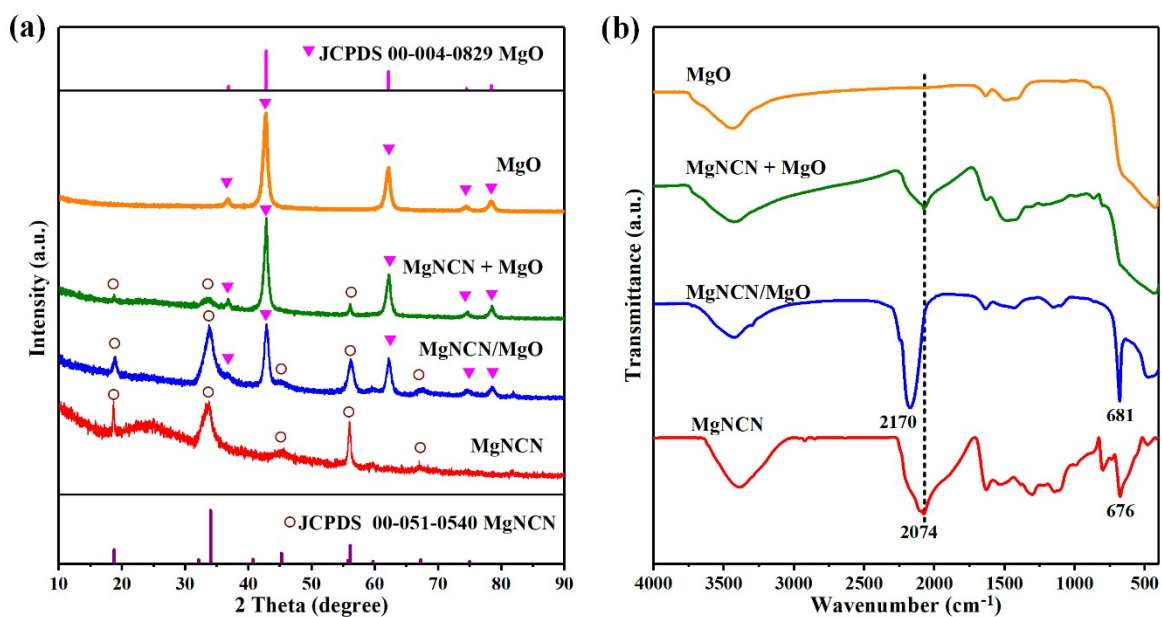

**Figure S2.** XRD patterns (a), FTIR spectra (b) of MgNCN, MgO, MgNCN/MgO nanocomposites and the physical mixture of MgNCN and MgO with mass ratio of 1:1.

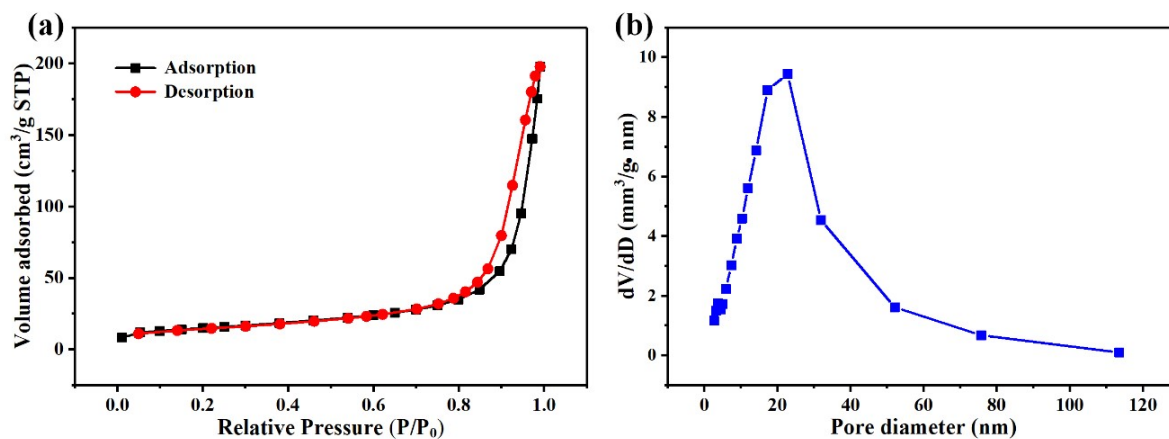

**Figure S3.** N<sub>2</sub> adsorption/desorption isotherms (a) and pore-size distribution (b) of MgNCN/MgO nanocomposites.

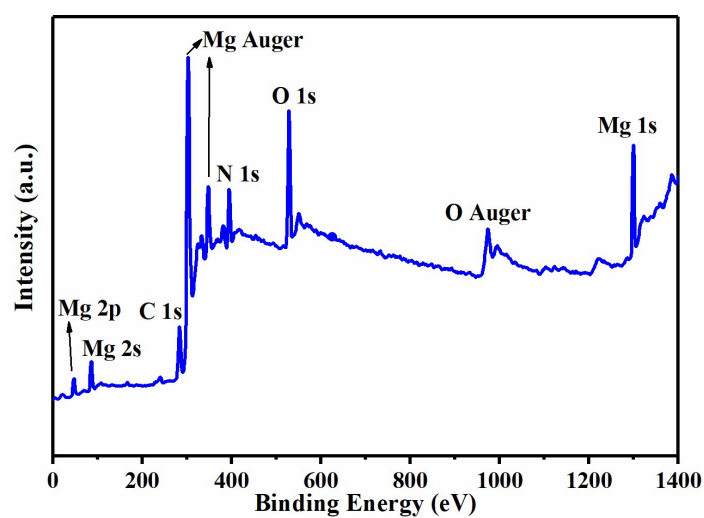

**Figure S4.** Survey XPS spectrum of MgNCN/MgO nanocomposites.

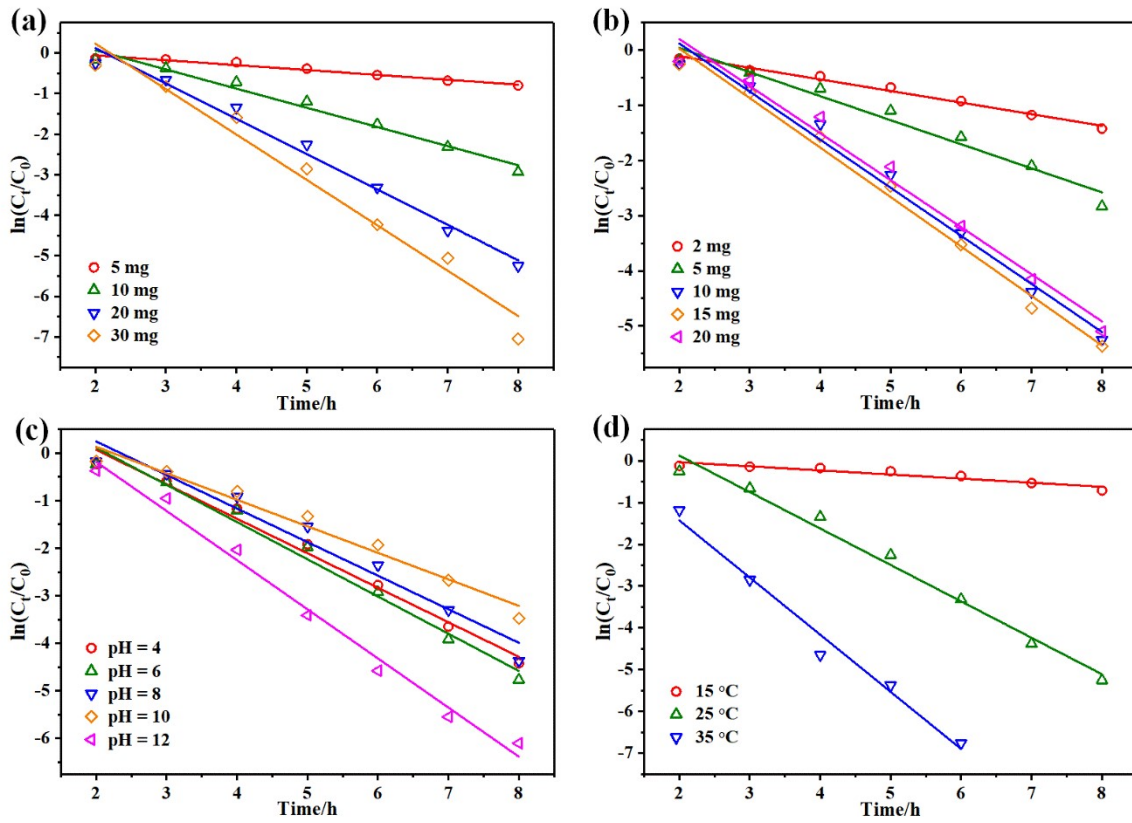

**Figure S5.** Pseudo-first-order kinetic curves of MB degradation under different conditions: MgO<sub>2</sub> dosage

(a), MgNCN/MgO dosage (b), initial solution pH (c), and degradation temperature (d).

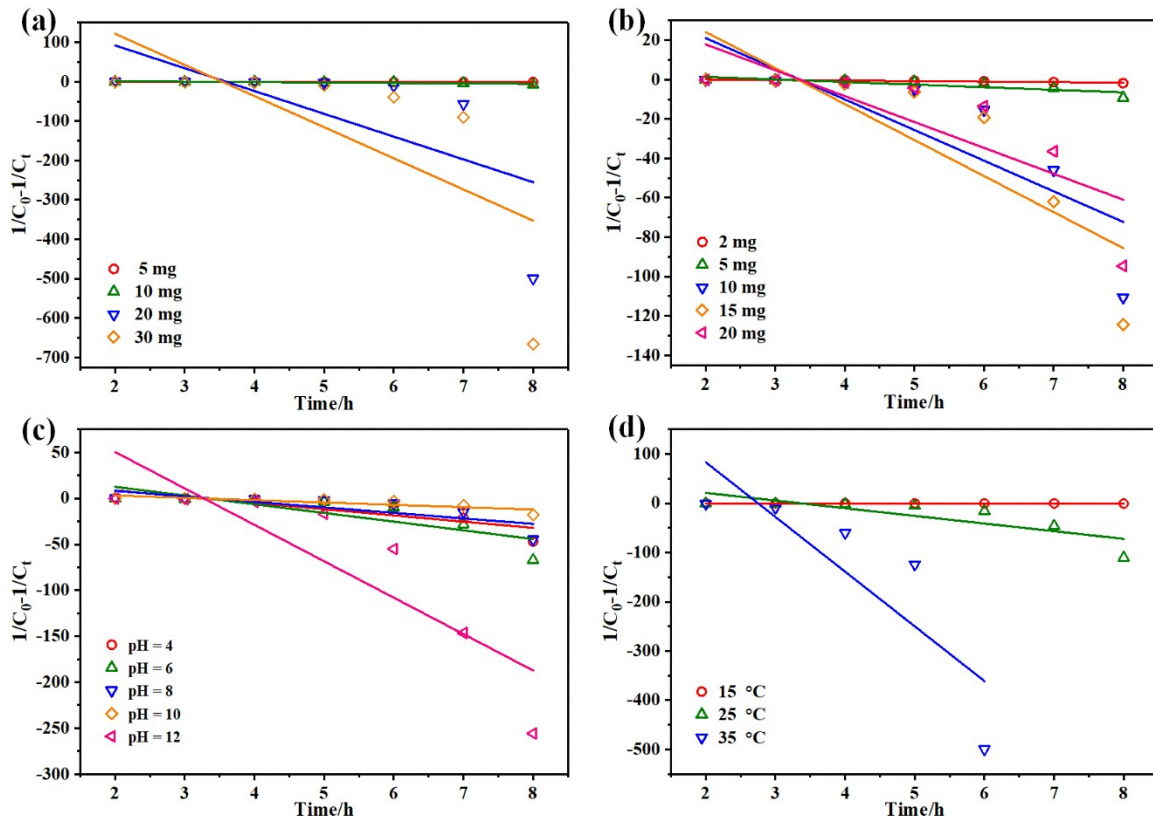

**Figure S6.** Pseudo-second-order kinetic curves of MB degradation under different conditions: MgO<sub>2</sub> dosage (a), MgNCN/MgO dosage (b), initial solution pH (c), and degradation temperature (d).

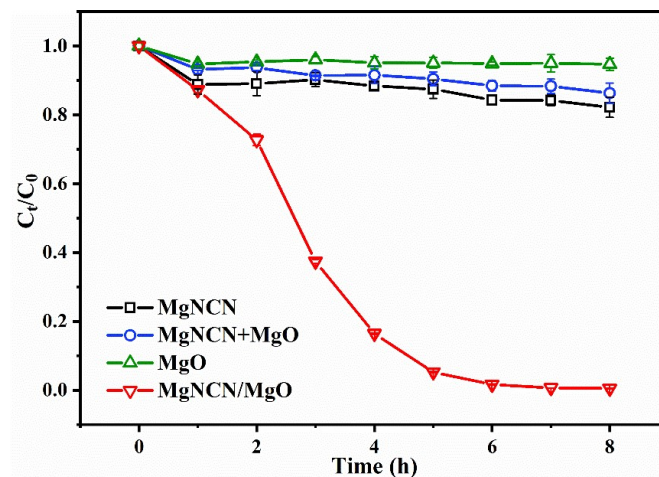

**Figure S7.** Comparative experiments of MB degradation with different activators (Reaction conditions : 100 mL of 10 mg/L MB, 20 mg of MgO<sub>2</sub>, 10 mg of activator).

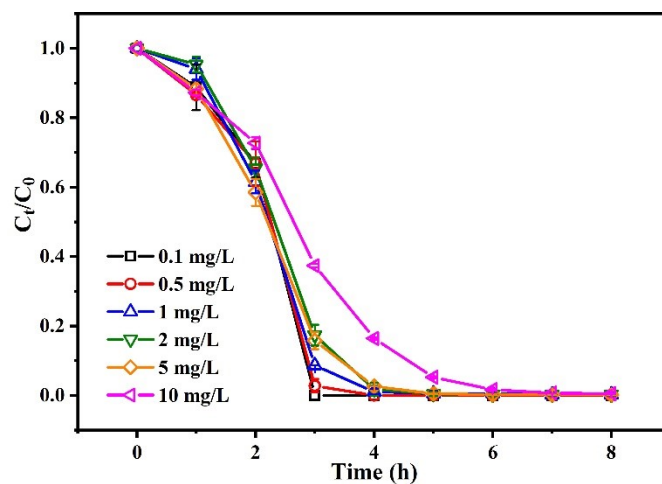

**Figure S8.** Effects of initial MB concentration on MB degradation (Reaction conditions: 100 mL of MB solution, 20 mg of  $\text{MgO}_2$ , 10 mg of  $\text{MgNCN/MgO}$ ).

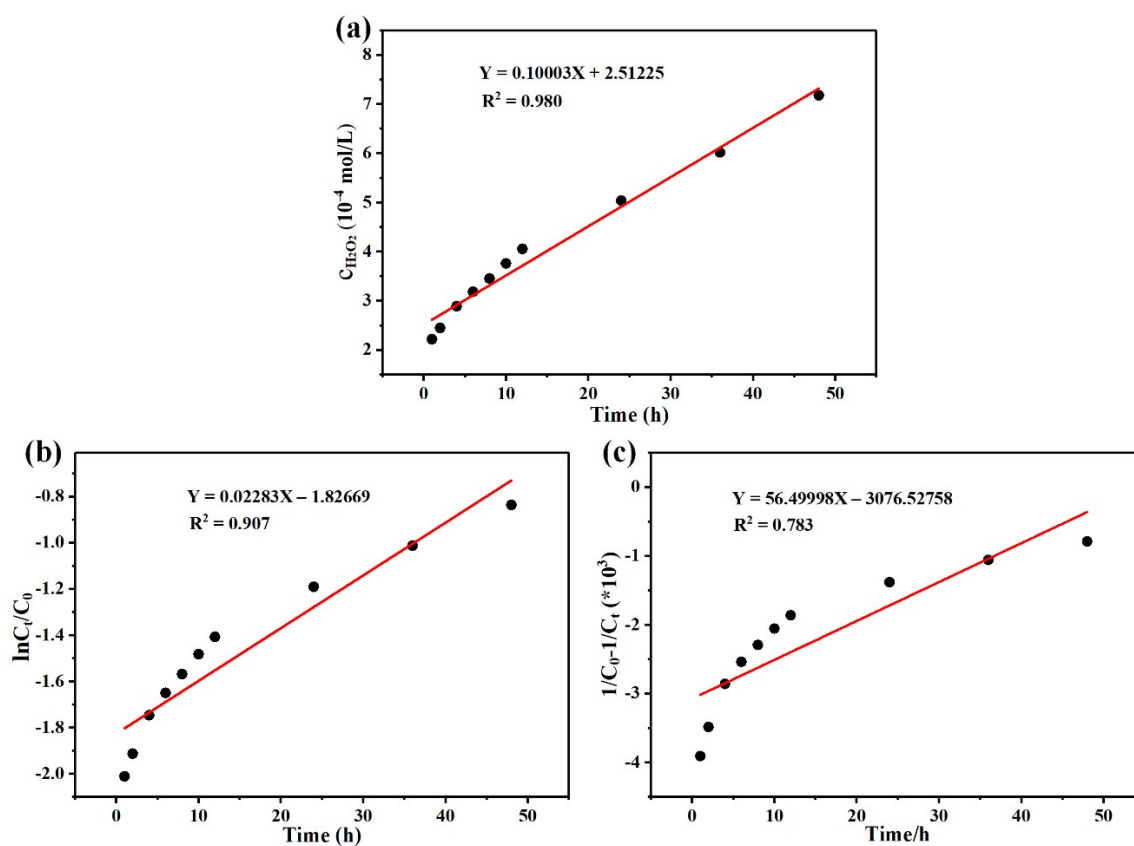

**Figure S9.** Linear curves fitted by pseudo-zero-order kinetic (a), pseudo-first-order kinetic (b) and pseudo-second-order kinetic (c) models for the  $\text{H}_2\text{O}_2$  release from  $\text{MgO}_2$ .



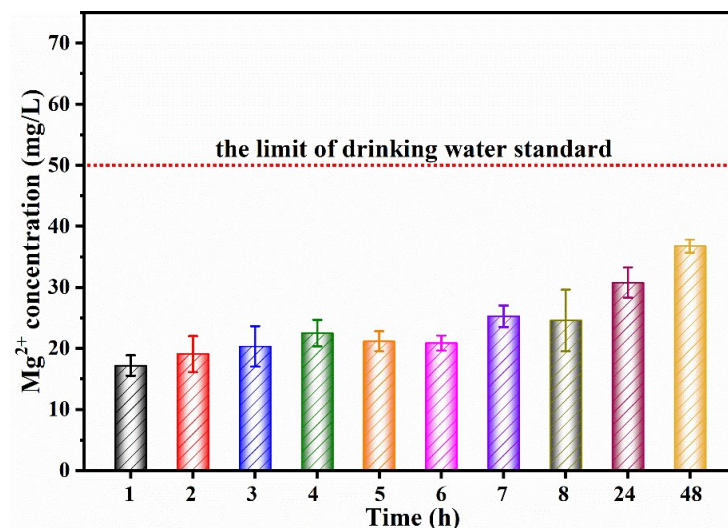

**Figure S10.** Mg<sup>2+</sup> concentrations released from the MgO<sub>2</sub>-MgNCN/MgO system (Reaction conditions: 100 mL of 10 mg/L MB, 20 mg of MgO<sub>2</sub>, 10 mg of MgNCN/MgO).

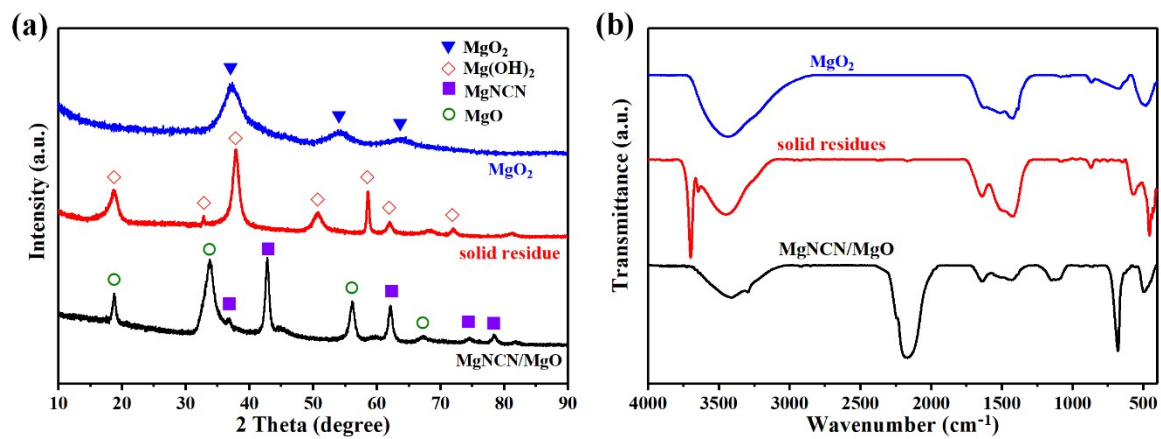

**Figure S11.** XRD patterns (a) and FTIR spectra (b) of MgO<sub>2</sub>, MgNCN/MgO and solid residue after 5 runs of MB degradation.

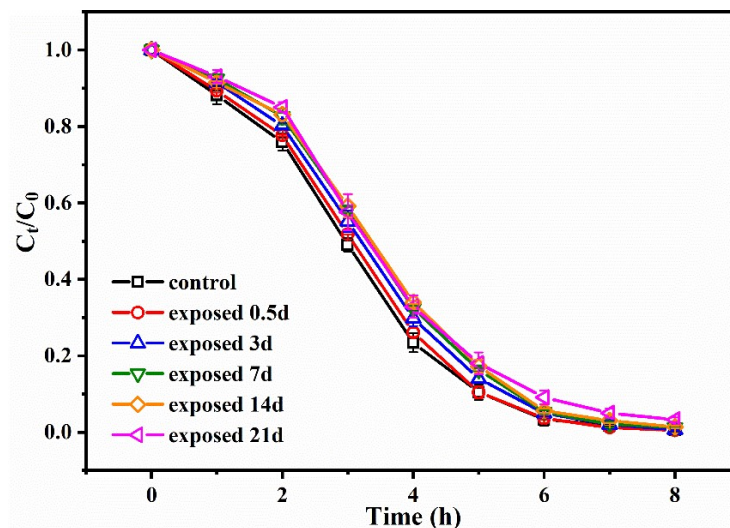

**Figure S12.** Effect of exposure time of  $MgO_2$  on MB degradation (Reaction conditions: 100 mL of 10 mg/L

MB, 20 mg of  $MgO_2$  with different exposure time, 10 mg of MgNCN/MgO).

**Table S1.** Kinetic parameters of MB degradation in the MgO<sub>2</sub>-MgNCN/MgO system under different conditions

| Parameters                         |    | Pseudo-first order model          |                             | Pseudo-second order model                            |                             |
|------------------------------------|----|-----------------------------------|-----------------------------|------------------------------------------------------|-----------------------------|
|                                    |    | K <sub>1</sub> (h <sup>-1</sup> ) | R <sub>1</sub> <sup>2</sup> | K <sub>2</sub> (L mg <sup>-1</sup> h <sup>-1</sup> ) | R <sub>2</sub> <sup>2</sup> |
| MgO <sub>2</sub><br>dosage<br>(mg) | 5  | 0.120                             | 0.969                       | 0.110                                                | 0.949                       |
|                                    | 10 | 0.473                             | 0.979                       | 1.092                                                | 0.726                       |
|                                    | 20 | 0.872                             | 0.985                       | 57.871                                               | 0.455                       |
|                                    | 30 | 1.120                             | 0.974                       | 79.071                                               | 0.486                       |
| MgNCN/MgO<br>dosage<br>(mg)        | 2  | 0.210                             | 0.988                       | 0.279                                                | 0.928                       |
|                                    | 5  | 0.437                             | 0.967                       | 1.315                                                | 0.748                       |
|                                    | 10 | 0.872                             | 0.985                       | 15.558                                               | 0.678                       |
|                                    | 15 | 0.897                             | 0.990                       | 18.295                                               | 0.714                       |
|                                    | 20 | 0.853                             | 0.983                       | 13.135                                               | 0.667                       |
| Initial solution<br>pH             | 4  | 0.725                             | 0.986                       | 6.782                                                | 0.719                       |
|                                    | 6  | 0.783                             | 0.982                       | 9.459                                                | 0.687                       |
|                                    | 8  | 0.706                             | 0.963                       | 5.995                                                | 0.634                       |
|                                    | 10 | 0.558                             | 0.971                       | 2.540                                                | 0.716                       |
|                                    | 12 | 1.033                             | 0.988                       | 39.616                                               | 0.765                       |
| T<br>(°C)                          | 15 | 0.098                             | 0.903                       | 0.085                                                | 0.861                       |
|                                    | 25 | 0.872                             | 0.985                       | 15.558                                               | 0.678                       |
|                                    | 35 | 1.368                             | 0.982                       | 111.117                                              | 0.717                       |

**Table S2.** Comparison of the capacities of other AOP systems for MB degradation.

| Degradation system                                                                   | Catalyst (g/L) | Oxidant (mM) | MB (mg/L) | pH range | Degradation efficiency (%) | References |
|--------------------------------------------------------------------------------------|----------------|--------------|-----------|----------|----------------------------|------------|
| MgO <sub>2</sub> +MgNCN/MgO                                                          | 0.1            | 3.6          | 10        | 4-12     | >98                        | This work  |
| H <sub>2</sub> O <sub>2</sub> +FePC                                                  | 0.5            | 1            | 100       | 2-5      | >90                        | 2          |
| H <sub>2</sub> O <sub>2</sub> +MPCMSs+ NH <sub>2</sub> OH                            | 2              | 16           | 40        | 3.1-9.6  | >40                        | 3          |
| H <sub>2</sub> O <sub>2</sub> +Fe <sub>3</sub> O <sub>4</sub> @MnO <sub>2</sub>      | 0.3            | 30           | 40        | 2-9      | >30                        | 4          |
| H <sub>2</sub> O <sub>2</sub> +Fe <sub>2</sub> GeS <sub>4</sub>                      | 0.3            | 50           | 20        | 3-11     | >40                        | 5          |
| H <sub>2</sub> O <sub>2</sub> +g-C <sub>3</sub> N <sub>4</sub> /CDs/Fe(II)           | 0.5            | 1            | 60        | 3-9      | >60                        | 6          |
| H <sub>2</sub> O <sub>2</sub> +Nb <sub>2</sub> O <sub>5</sub>                        | 1              | 441.2        | 37.5      | 5        | 100                        | 7          |
| H <sub>2</sub> O <sub>2</sub> +PCN-250 (Fe <sub>2</sub> Mn)                          | 0.5            | 4000         | 15        | natural  | 100                        | 8          |
| MgO <sub>2</sub> +Fe <sub>2</sub> (SO <sub>4</sub> ) <sub>3</sub> ·xH <sub>2</sub> O | 0.1            | 0.9          | 20        | 2-10     | >90                        | 9          |
| PMS+BC-CuO                                                                           | 0.2            | 2            | 37.4      | 3-11     | >80                        | 10         |
| PMS+Elbaite                                                                          | 1              | 0.7          | 5         | 2-12     | >30                        | 11         |

**Table S3.** Water quality of tap water.

| No. | Substance                                                       | Concentration   |
|-----|-----------------------------------------------------------------|-----------------|
| 1   | Ammonia nitrogen (mg/L)                                         | □0.02           |
| 2   | Cyanogen chloride (mg/L)                                        | □0.01           |
| 3   | Atrazine (mg/L)                                                 | □0.0001         |
| 4   | 1,2-dichlorobenzene (mg/L)                                      | □0.001          |
| 5   | Chlorobenzene (mg/L)                                            | □0.001          |
| 6   | $\alpha$ -1,2,3,4,5,6-Hexachlorocyclohexane ( $\mu\text{g/L}$ ) | $\leq 0.000002$ |
| 7   | Parathion (mg/L)                                                | □0.001          |
| 8   | 2,4,6-trichlorophenol (mg/L)                                    | □0.0005         |

**Table S4.** Water quality of different types of surface water.

| No. | Surface water                    |               |                         |       |
|-----|----------------------------------|---------------|-------------------------|-------|
|     | Standard value                   | Yangtze River | East lake and Han River |       |
|     | Project                          |               | Moon lake               |       |
| 1   | pH                               | 6 ~ 9         |                         |       |
| 2   | Dissolved oxygen $\geq$          | 6             | 5                       | 3     |
| 3   | Permanganate Index (mg/L) $\leq$ | 4             | 6                       | 10    |
| 4   | COD (mg/L) $\leq$                | 15            | 20                      | 30    |
| 5   | BOD <sub>5</sub> (mg/L) $\leq$   | 3             | 4                       | 6     |
| 6   | NH <sub>3</sub> -N (mg/L) $\leq$ | 0.5           | 1.0                     | 1.5   |
| 7   | Total phosphorus (mg/L) $\leq$   | 0.1           | 0.2                     | 0.3   |
| 8   | Total nitrogen (mg/L) $\leq$     | 0.5           | 1.0                     | 1.5   |
| 9   | Cu (mg/L) $\leq$                 | 1.0           | 1.0                     | 1.0   |
| 10  | Zn (mg/L) $\leq$                 | 1.0           | 1.0                     | 2.0   |
| 11  | F <sup>-</sup> (mg/L) $\leq$     | 1.0           | 1.0                     | 1.5   |
| 12  | Se (mg/L) $\leq$                 | 0.01          | 0.01                    | 0.02  |
| 13  | As (mg/L) $\leq$                 | 0.05          | 0.05                    | 0.1   |
| 14  | Hg (mg/L) $\leq$                 | 0.00005       | 0.0001                  | 0.001 |
| 15  | Cd (mg/L) $\leq$                 | 0.005         | 0.005                   | 0.005 |
| 16  | Cr <sup>6+</sup> (mg/L) $\leq$   | 0.05          | 0.05                    | 0.05  |
| 17  | Pb (mg/L) $\leq$                 | 0.01          | 0.05                    | 0.05  |
| 18  | Cyanide (mg/L) $\leq$            | 0.05          | 0.2                     | 0.2   |
| 19  | Volatile Phenol (mg/L) $\leq$    | 0.002         | 0.005                   | 0.01  |
| 20  | Petroleum (mg/L) $\leq$          | 0.05          | 0.05                    | 0.5   |
| 21  | Anionic Surfactant (mg/L) $\leq$ | 0.2           | 0.2                     | 0.3   |
| 22  | Sulfide (mg/L) $\leq$            | 0.1           | 0.2                     | 0.5   |
| 23  | Fecal coliforms (CFU/L) $\leq$   | 2000          | 10000                   | 20000 |

**References**

1. X. Yang, J. Cai, X. Wang, Y. Li, Z. Wu, W. D. Wu, X. D. Chen, J. Sun, S. P. Sun and Z. Wang, A bimetallic Fe-Mn oxide-activated oxone for in situ chemical oxidation (ISCO) of trichloroethylene in groundwater: efficiency, sustained activity, and mechanism investigation, *Environ. Sci. Technol.*, 2020, **54**, 3714-3724.
2. C. Ma, S. Feng, J. Zhou, R. Chen, Y. Wei, H. Liu and S. Wang, Enhancement of H<sub>2</sub>O<sub>2</sub> decomposition efficiency by the co-catalytic effect of iron phosphide on the Fenton reaction for the degradation of methylene blue, *Appl. Catal. B: Environ.*, 2019, **259**, 118015.
3. L. Zhou, Y. Shao, J. Liu, Z. Ye, H. Zhang, J. Ma, Y. Jia, W. Gao and Y. Li, Preparation and characterization of magnetic porous carbon microspheres for removal of methylene blue by a heterogeneous Fenton reaction, *ACS Appl. Mater. Interfaces*, 2014, **6**, 7275-7285.
4. L. Wolski, A. Walkowiak and M. Ziolk, Formation of reactive oxygen species upon interaction of Au/ZnO with H<sub>2</sub>O<sub>2</sub> and their activity in methylene blue degradation, *Catal. Today*, 2019, **333**, 54-62.
5. X. Shi, A. Tian, J. You, H. Yang, Y. Wang and X. Xue, Degradation of organic dyes by a new heterogeneous Fenton reagent-Fe<sub>2</sub>GeS<sub>4</sub> nanoparticle, *J. Hazard. Mater.*, 2018, **353**, 182-189.
6. X. Li, Y. Pi, L. Wu, Q. Xia, J. Wu, Z. Li and J. Xiao, Facilitation of the visible light-induced Fenton-like excitation of H<sub>2</sub>O<sub>2</sub> via heterojunction of g-C<sub>3</sub>N<sub>4</sub>/NH<sub>2</sub>-Iron terephthalate metal-organic framework for MB degradation, *Appl. Catal. B: Environ.*, 2017, **202**, 653-663.
7. L. Wolski and M. Ziolk, Insight into pathways of methylene blue degradation with H<sub>2</sub>O<sub>2</sub> over mono and bimetallic Nb, Zn oxides, *Appl. Catal. B: Environ.*, 2018, **224**, 634-647.
8. A. Kirchon, P. Zhang, J. Li, E. A. Joseph, W. Chen and H. C. Zhou, Effect of isomorphic metal substitution on the Fenton and photo-Fenton degradation of methylene blue using Fe-based metal-organic frameworks, *ACS Appl. Mater. Interfaces*, 2020, **12**, 9292-9299.
9. D. Wu, Y. Bai, W. Wang, H. Xia, F. Tan, S. Zhang, B. Su, X. Wang, X. Qiao and P. K. Wong, Highly pure MgO<sub>2</sub> nanoparticles as robust solid oxidant for enhanced Fenton-like degradation of organic contaminants, *J. Hazard. Mater.*, 2019, **374**, 319-328.

10. Z. Li, D. Liu, W. Huang, X. Wei and W. Huang, Biochar supported CuO composites used as an efficient peroxymonosulfate activator for highly saline organic wastewater treatment, *Sci. Total Environ.*, 2020, **721**, 137764.
11. C. Yu, M. Wen, S. Li, Z. Tong, Y. Yin, X. Liu, Y. Li, Z. Wu and D. D. Dionysiou, Elbaite catalyze peroxymonosulfate for advanced oxidation of organic pollutants: Hydroxyl groups induced generation of reactive oxygen species, *J. Hazard. Mater.*, 2020, **398**, 122932.
